# Supplementary material for: Valve disease and aortopathy associations of bicuspid aortic valve phenotypes differ between men and women
Source: PubMed Central journal article supplement (PMC8529975; doi:10.1136/openhrt-2021-001857), 2021-10-20
Supplement: openhrt-2021-001857supp001.pdf [file openhrt-2021-001857supp001.pdf]

## Supplemental Data

Supplemental Table 1. Surgical indications.

| SURGICAL INDICATION                                                    | All (n=1045)        | Men (n=794)         | Women (n=251)       | P-value |
|------------------------------------------------------------------------|---------------------|---------------------|---------------------|---------|
| Aortic valve stenosis, n (%)                                           | 561 (53.7)          | 377 (47.5)          | 184 (73.3)          | <0.001  |
| Mean gradient, mmHg                                                    | 52.3 ± 15.0 (n=539) | 50.8 ± 14.0 (n=363) | 55.4 ± 16.4 (n=176) | 0.001   |
| Severe AS, n (%)                                                       | 479 (45.9)          | 315 (39.7)          | 164 (65.3)          | <0.001  |
| Moderate AS with dilatation ≥4.5 cm, n (%)                             | 51 (4.9)            | 43 (5.4)            | 8 (3.2)             | 0.153   |
| Severe AS with dilatation ≥5.5 cm, n (%)                               | 12 (1.1)            | 7 (0.9)             | 5 (2.0)             | 0.173   |
| Aortic valve insufficiency, n (%)                                      | 249 (23.8)          | 231 (29.1)          | 18 (7.2)            | <0.001  |
| Severe AI, n (%)                                                       | 202 (19.3)          | 187 (23.6)          | 15 (6.0)            | <0.001  |
| Moderate AI with dilatation ≥4.5 cm, n (%)                             | 34 (3.3)            | 27 (3.4)            | 7 (2.8)             | 0.634   |
| Severe AI with dilatation ≥5.5 cm, n (%)                               | 14 (1.3)            | 13 (1.6)            | 1 (0.4)             | 0.208   |
| Aortic dilatation, n (%)                                               | 97 (9.3)            | 72 (9.1)            | 25 (10.0)           | 0.671   |
| Maximum diameter, cm, median [IQR]                                     | 5.3 [0.8]           | 5.4 [0.7]           | 5.0 [0.8]           | 0.014   |
| Aorta ≥5.5 cm, n (%)                                                   | 36 (3.4)            | 31 (3.9)            | 5 (2.0)             | 0.148   |
| Other cardiac surgery, n (%)                                           | 15 (1.4)            | 13 (1.6)            | 2 (0.8)             | 0.542   |
| AS or AI, degree missing, n (%)                                        | 8 (0.8)             | 8 (1.0)             | 0 (0.0)             | 0.210   |
| Aortic dilatation, dimensions missing, n (%)                           | 1 (0.1)             | 1 (0.1)             | 0 (0.0)             | 1.000   |
| AS or AI and aortic dilatation, severity and dimensions missing, n (%) | 3 (0.3)             | 2 (0.3)             | 1 (0.4)             | 0.562   |

AS=aortic valve stenosis. AI=aortic valve insufficiency. IQR=interquartile range.

**Supplemental Table 2. Correlations with any aortic dilatation, male patients (n=712).**

| UNIVARIATE                     | OR    | 95% CI         | P-value |
|--------------------------------|-------|----------------|---------|
| Age                            | 1.004 | 0.993 - 1.015  | 0.499   |
| BSA                            | 5.44  | 2.322 - 12.749 | <0.001  |
| Dyslipidemia                   | 0.916 | 0.568 - 1.476  | 0.718   |
| Hypertension                   | 1.176 | 0.857 - 1.613  | 0.315   |
| CABG                           | 1.129 | 0.588 - 2.165  | 0.716   |
| <b>Valve disease (Ref: AS)</b> |       |                |         |
| AI                             | 1.102 | 0.794 - 1.529  | 0.562   |
| <b>Phenotype (Ref: RL)</b>     |       |                |         |
| RN                             | 0.639 | 0.401 - 1.018  | 0.059   |
| LN                             | 0.231 | 0.029 - 1.863  | 0.169   |
| 2-sinus                        | 0.903 | 0.52 - 1.568   | 0.718   |
| MULTIVARIATE                   |       |                |         |
| Age                            | 1.01  | 0.996 - 1.023  | 0.155   |
| BSA                            | 5.775 | 2.425 - 13.753 | <0.001  |
| <b>Valve disease (Ref: AS)</b> |       |                |         |
| AI                             | 1.24  | 0.839 - 1.833  | 0.281   |
| <b>Phenotype (Ref: RL)</b>     |       |                |         |
| RN                             | 0.643 | 0.401 - 1.031  | 0.067   |
| LN                             | 0.287 | 0.035 - 2.355  | 0.245   |
| 2-sinus                        | 0.916 | 0.521 - 1.61   | 0.761   |

BSA=body surface area. CABG=coronary artery bypass grafting. AS=aortic valve stenosis. AI=aortic valve insufficiency. RL=right-left fusion. RN=right-non-coronary fusion. LN=left-non-coronary fusion. OR=odds ratio.

**Supplemental Table 3. Correlations with root phenotype dilatation, male patients (n=712).**

| UNIVARIATE                     | OR    | 95% CI         | P-value |
|--------------------------------|-------|----------------|---------|
| Age                            | 0.987 | 0.951 - 1.024  | 0.479   |
| BSA                            | 0.557 | 0.031 - 10.095 | 0.692   |
| Hypertension                   | 1.080 | 0.371 - 3.147  | 0.887   |
| Dyslipidemia                   | 0.000 | -              | 0.997   |
| CABG                           | 1.233 | 0.157 - 9.655  | 0.842   |
| <b>Valve disease (Ref: AS)</b> |       |                |         |
| AI                             | 1.074 | 0.356 - 3.240  | 0.899   |
| <b>Phenotype (Ref: RL)</b>     |       |                |         |
| RN                             | 0.000 | -              | 0.996   |
| LN                             | 0.000 | -              | 0.999   |
| 2-sinus                        | 4.906 | 1.591 - 15.124 | 0.006   |
| MULTIVARIATE                   |       |                |         |
| Age                            | 0.999 | 0.960 - 1.039  | 0.947   |
| BSA                            | 0.522 | 0.039 - 6.965  | 0.623   |
| <b>Valve disease (Ref: AS)</b> |       |                |         |
| AI                             | 0.842 | 0.250 - 2.835  | 0.781   |
| <b>Phenotype (Ref: RL)</b>     |       |                |         |
| RN                             | 0.000 | -              | 0.996   |
| LN                             | 0.000 | -              | 0.999   |
| 2-sinus                        | 4.810 | 1.516 - 15.259 | 0.008   |

BSA=body surface area. CABG=coronary artery bypass grafting. AS=aortic valve stenosis. AI=aortic valve insufficiency. RL=right-left fusion. RN=right-non-coronary fusion. LN=left-non-coronary fusion. OR=odds ratio.
